# Supplementary material
Source: ML conference proceedings conference paper supplement (https://openaccess.thecvf.com/content/CVPR2024/html/Xiang_MaxQ_Multi-Axis_Query_CVPR_2024_paper.html)
Supplement: Supplementary file 1 [file Xiang_MaxQ_Multi-Axis_Query_CVPR_2024_supplemental.pdf]

# MaxQ: Multi-Axis Query for N:M Sparsity Network

## Supplementary Material

### 6. MaxQ on ViT

#### 6.1. Implementation Details

|                                   | DeiT-Small           |
|-----------------------------------|----------------------|
| Stochastic depth survival prob    | 0.90                 |
| $t_i$                             | 0                    |
| $t_f$                             | 225                  |
| Data augmentation                 | rand-m9-mstd0.5-inc1 |
| Repeated Augmentation             | off                  |
| Input resolution                  | 224                  |
| Epochs                            | 300                  |
| Batch size                        | 1024                 |
| Warmup epochs                     | 20                   |
| Hidden dropout                    | 0                    |
| GeLU dropout                      | 0                    |
| Attention dropout (if applicable) | 0                    |
| Classification dropout            | 0                    |
| Random erasing prob               | 0.25                 |
| EMA decay                         | 0                    |
| Cutmix $\alpha$                   | 1.0                  |
| Mixup $\alpha$                    | 0.8                  |
| Cutmix-Mixup switch prob          | 0.5                  |
| Label smoothing                   | 0.1                  |
| Peak learning rate                | 1e-3                 |
| Learning rate decay               | cosine               |
| Optimizer                         | AdamW                |
| Adam $\epsilon$                   | 1e-6                 |
| Adam $(\beta_1, \beta_2)$         | (0.9, 0.999)         |
| Weight decay                      | 0.05                 |
| Gradient clipping                 | 5.0                  |

Table 11. Hyperparameters for DeiT-Small on ImageNet-1K.

#### 6.2. Results for ImageNet

| Model      | Method      | N:M | Top-1        | Epochs | FLOPs | Params |
|------------|-------------|-----|--------------|--------|-------|--------|
|            | Baseline    | -   | 79.8%        | 300    | 4.6G  | 22.1M  |
| DeiT-Small | SR-STE      | 2:4 | 75.7%        | 300    | 2.5G  | 11.4M  |
|            | LBC         | 2:4 | 78.0%        | 300    | 2.5G  | 11.4M  |
|            | <b>MaxQ</b> | 2:4 | <b>78.5%</b> | 300    | 2.5G  | 11.4M  |

Table 12. Results of the different N:M sparsity training methods for DeiT-Small on ImageNet.

To further validate the effectiveness of MaxQ on Vision Transformer (ViT), we conducted experiments with 2:4 sparsity on DeiT [40]. The hyperparameters and experiment results are shown in Tab. 11 and Tab. 12. MaxQ achieves 78.5% top-1 accuracy at 2:4 sparse pattern while saving 45.6% FLOPs and 48.5% parameters. Meanwhile, it exceeds SR-STE and LBC by 2.8% and 0.5% respectively. It demonstrates that MaxQ is general and can enhance the performance of different types of deep neural networks.

| Model    | N:M  | $t_i$ | $t_f$ | Scheduler        | Top-1 |
|----------|------|-------|-------|------------------|-------|
| ResNet50 | 1:16 | 0     | 90    | cubic (Eq. (8))  | 74.6% |
|          | 1:16 | 0     | 90    | linear (Eq. (9)) | 74.5% |
|          | 1:16 | 0     | 90    | cos (Eq. (10))   | 74.3% |

Table 13. Ablation study of different  $t_i$  and  $t_f$  in MaxQ.

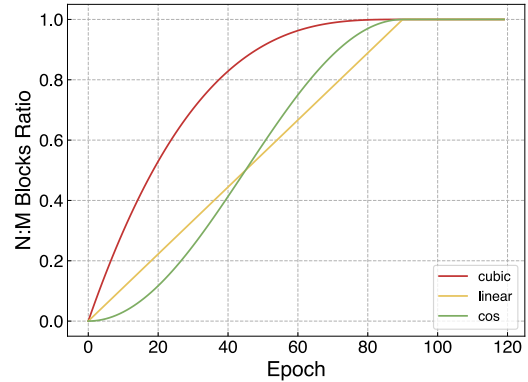

Figure 8. Visualization for N:M blocks ratio with different incremental schedulers.

### 7. More Ablation Study

#### 7.1. Incremental Schedulers

The ratio of N:M sparse blocks increases gradually with the training epoch. We conduct several experiments for incremental schedulers to compare their effectiveness, including cubic (default), linear Eq. (9) and cos Eq. (10) as follows:

$$\delta_t = \min(1, \max(0, (t - t_i)/(t_f - t_i))) \quad (9)$$

$$\delta_t = \begin{cases} 0, & t \leq t_i \\ 1 - \frac{1}{2} \left( 1 + \cos\left(\frac{t-t_i}{t_f-t_i}\pi\right) \right), & t_i < t \leq t_f \\ 1, & t_f < t \end{cases} \quad (10)$$

As shown in Tab. 13, cubic scheduler (default) performs better than the other schemes by 0.1% and 0.3% top-1 accuracy. We draw the N:M blocks ratio change for these three schemes in Fig. 8. It suggests that rapidly increasing the ratio of N:M sparse blocks at the beginning of training will facilitate the model’s convergence and achieves better performance.

### 8. Optimization

For back propagation, MaxQ follows the SR-STE

$$\mathbf{m}_{t+1}^l = \mathbf{m}_t^l - \gamma_t [g(\mathbf{s}_t^l \odot \mathbf{m}_t^l) + \sigma(1 - \text{clip}(\mathbf{s}_t^l, 0, 1)) \odot \mathbf{m}_t^l] \quad (11)$$

where  $\gamma_t$  is the learning rate for the t-step,  $\sigma$  is the denotes the relative weight for the sparse-refined term and we set them to  $2 \times \text{weight\_decay}$ ,  $g$  is the gradient function and we estimate the gradient for mask operator by straight-through estimator (STE). Meanwhile, we clip the  $s^l$  to  $[0, 1]$  for avoiding negative values.
